# Supplementary material for: Circulating Levels of Testosterone, Sex Hormone Binding Globulin and Colorectal Cancer Risk: Observational and Mendelian Randomization Analyses
Source: Oxford University Press journal article supplement (doi:10.1158/1055-9965.epi-20-1690), 2021-04-20
Supplement: 10559965epi201690-sup-256320_2_supp_7026054_qqvzvc.doc [file 10559965epi201690-sup-256320_2_supp_7026054_qqvzvc.doc]

| **Supplementary Table 3. Results of the association between circulating total testosterone, free testosterone, and sex hormone binding globulin (SHBG) levels and colorectal cancer risk in the UK Biobank excluding outliers.** | | | | | | |
| --- | --- | --- | --- | --- | --- | --- |
|  | **Total testosterone** | | **Free testosterone** | | **SHBG** | |
|  | **HR a** | **HR (adjusted) b** | **HR c** | **HR (adjusted) d** | **HR e** | **HR (adjusted) f** |
| *Women* g |  |  |  |  |  |  |
| **Colorectal cancer** | 0.99 (0.92 - 1.06) | 0.98 (0.88 - 1.09) | 0.92 (0.80 - 1.05) | 0.88 (0.73 - 1.07) | 1.14 (1.05 - 1.25) | 1.18 (1.06 - 1.31) |
| **Colon cancer** | 1.01 (0.93 - 1.10) | 1.02 (0.90 - 1.16) | 0.96 (0.82 - 1.13) | 0.95 (0.76 - 1.18) | 1.12 (1.01 - 1.24) | 1.15 (1.01 - 1.30) |
| **Proximal colon cancer** | 0.97 (0.87 - 1.09) | 0.96 (0.80 - 1.14) | 0.85 (0.68 - 1.05) | 0.79 (0.58 - 1.07) | 1.19 (1.04 - 1.36) | 1.23 (1.04 - 1.45) |
| **Distal colon cancer** | 1.04 (0.92 - 1.19) | 1.07 (0.87 - 1.31) | 1.04 (0.81 - 1.33) | 1.05 (0.74 - 1.50) | 1.10 (0.94 - 1.29) | 1.13 (0.93 - 1.37) |
| **Rectal cancer** | 0.91 (0.79 - 1.05) | 0.87 (0.70 - 1.08) | 0.80 (0.61 - 1.04) | 0.73 (0.50 - 1.06) | 1.21 (1.02 - 1.44) | 1.27 (1.03 - 1.56) |
| *Men* h |  |  |  |  |  |  |
| **Colorectal cancer** | 0.98 (0.91 - 1.04) | 0.97 (0.87 - 1.07) | 1.00 (0.94 - 1.05) | 0.99 (0.90 - 1.10) | 1.00 (0.84 - 1.21) | 1.01 (0.81 - 1.27) |
| **Colon cancer** | 0.96 (0.88 - 1.05) | 0.94 (0.83 - 1.07) | 0.99 (0.91 - 1.06) | 0.97 (0.86 - 1.11) | 1.09 (0.86 - 1.38) | 1.11 (0.83 - 1.48) |
| **Proximal colon cancer** | 0.91 (0.80 - 1.03) | 0.87 (0.72 - 1.05) | 0.94 (0.85 - 1.05) | 0.90 (0.75 - 1.09) | 1.09 (0.77 - 1.53) | 1.11 (0.73 - 1.67) |
| **Distal colon cancer** | 1.02 (0.90 - 1.16) | 1.03 (0.85 - 1.24) | 1.03 (0.93 - 1.15) | 1.06 (0.88 - 1.28) | 0.99 (0.70 - 1.41) | 0.99 (0.65 - 1.51) |
| **Rectal cancer** | 1.01 (0.90 - 1.13) | 1.02 (0.86 - 1.19) | 1.01 (0.92 - 1.11) | 1.02 (0.87 - 1.20) | 0.89 (0.66 - 1.20) | 0.87 (0.61 - 1.25) |
| HR=hazard ratio; CI=confidence interval; SD=standard deviation. Multivariable Cox regression model using age as the underlying time variable and stratified by sex, Townsend deprivation index (quintiles), region of the recruitment assessment center, and age at recruitment. Models adjusted for waist circumference (per 5 cm), total physical activity (<10, 10-<20, 20-<40, 40-<60, ≥60 MET hours per week, unknown), height (per 10 cm), alcohol consumption frequency (never, special occasions only, 1-3 times per month, 1-2 times per week, 3-4 times per week, daily/almost daily, unknown), smoking status and intensity (never, former, current- <15 per day, current- ≥15 per day, current- intensity unknown, unknown), frequency of red and processed meat consumption (<2, 2-<3, 3-<4, ≥4 occasions per week, unknown), family history of colorectal cancer (no, yes, unknown), educational level (CSEs/O-levels/GCSEs or equivalent, NVQ/HND/HNC/A-levels/AS-levels or equivalent, other professional qualifications, college/university degree, none of the above, unknown), regular aspirin/ibuprofen use (no, yes, unknown), ever use of hormone replacement therapy (no, yes, unknown), circulating levels (sex-specific quintiles, missing/unknown) of C-reactive protein (CRP; mg/L), glycated hemoglobin (HbA1c; mmol/mol), and Insulin-like growth factor-1 (IGF-1; nmol/L).  a:HRs per 1-SD increment in both women and men additional adjusted for sex hormone binding globulin (SHBG; nmol/L).  b: HRs were additionally corrected for regression dilution using a regression dilution ratio (0.65 in women and 0.68 in men) obtained from the subsample of participants with repeat total testosterone measurements.  c: HRs per 1-unit increment (log scale) in women and per 1-SD increment in men.  d:HRs were additionally corrected for regression dilution using a regression dilution ratio (0.71 in women and 0.57 in men) obtained from the subsample of participants with repeat free testosterone measurements.  e: HRs per 1-SD increment in women and per 1-unit increment (log scale) in men additionally adjusted for testosterone (nmol/L).  f: HRs were additionally corrected for regression dilution using a regression dilution ratio (0.82 in women and 0.83 in men) obtained from the subsample of participants with repeat SHBG measurements.  g: 1,120 outliers were excluded for total testosterone and SHBG, and 1,023 for free testosterone.  h: 2,199 outliers were excluded in SHBG analyses, and 1,206 in total testosterone and free testosterone. | | | | | | |
