# Supplementary material for: Circulating Levels of Testosterone, Sex Hormone Binding Globulin and Colorectal Cancer Risk: Observational and Mendelian Randomization Analyses
Source: Oxford University Press journal article supplement (doi:10.1158/1055-9965.epi-20-1690), 2021-04-20
Supplement: 10559965epi201690-sup-256320_2_supp_7026060_qqvzxc.doc [file 10559965epi201690-sup-256320_2_supp_7026060_qqvzxc.doc]

| **Supplementary Table 5. Risk (hazard ratios) of colorectal cancer associated with circulating (A) total testosterone, (B) free testosterone, and (C) sex hormone binding globulin (SHBG) levels in the UK Biobank in women excluding (i) ever menopausal hormone users (N=50,948) and (ii) those with polycystic ovary syndrome (N=329).** | | | | | | | | | |
| --- | --- | --- | --- | --- | --- | --- | --- | --- | --- |
|  | **(A) Total testosterone** | |  |  |  |  |  |  |  |
|  |  | **Q1** | **Q2** | **Q3** | **Q4** | **Q5** | **P-trend** | **HR a** | **HR (adjusted) b** |
| **i) Exclude women who ever used hormone-replacement therapy (N=50,948)** | | | | | | | | | |
| **Colorectal cancer** | |  |  |  |  |  |  |  |  |
|  | *N* cases | 105 | 91 | 99 | 99 | 90 |  |  |  |
|  | Model 1 | 1 | 0.91 (0.69 - 1.21) | 1.06 (0.80 - 1.39) | 1.07 (0.81 - 1.42) | 0.99 (0.75 - 1.32) | 0.65 | 1.04 (0.95 - 1.13) | 1.06 (0.92 - 1.21) |
|  | Model 2 | 1 | 0.91 (0.69 - 1.21) | 1.04 (0.79 - 1.37) | 1.06 (0.80 - 1.40) | 0.97 (0.73 - 1.30) | 0.77 | 1.03 (0.94 - 1.13) | 1.05 (0.91 - 1.20) |
| **Colon cancer** | |  |  |  |  |  |  |  |  |
|  | *N* cases | 71 | 70 | 74 | 70 | 65 |  |  |  |
|  | Model 1 | 1 | 1.05 (0.75 - 1.46) | 1.17 (0.84 - 1.62) | 1.13 (0.81 - 1.58) | 1.05 (0.75 - 1.48) | 0.62 | 1.06 (0.96 - 1.18) | 1.10 (0.94 - 1.29) |
|  | Model 2 | 1 | 1.04 (0.75 - 1.45) | 1.15 (0.83 - 1.59) | 1.12 (0.80 - 1.56) | 1.03 (0.73 - 1.44) | 0.74 | 1.05 (0.95 - 1.17) | 1.08 (0.92 - 1.28) |
| **Proximal colon cancer** | |  |  |  |  |  |  |  |  |
|  | *N* cases | 39 | 41 | 30 | 36 | 34 |  |  |  |
|  | Model 1 | 1 | 1.09 (0.70 - 1.70) | 0.88 (0.54 - 1.41) | 1.09 (0.69 - 1.72) | 1.01 (0.64 - 1.62) | 0.98 | 1.03 (0.89 - 1.19) | 1.05 (0.84 - 1.31) |
|  | Model 2 | 1 | 1.08 (0.70 - 1.68) | 0.85 (0.52 - 1.37) | 1.06 (0.67 - 1.67) | 0.98 (0.62 - 1.57) | 0.90 | 1.02 (0.88 - 1.18) | 1.03 (0.82 - 1.29) |
| **Distal colon cancer** | |  |  |  |  |  |  |  |  |
|  | *N* cases | 31 | 28 | 40 | 31 | 25 |  |  |  |
|  | Model 1 | 1 | 0.97 (0.58 - 1.63) | 1.43 (0.89 - 2.29) | 1.11 (0.67 - 1.84) | 0.88 (0.51 - 1.50) | 0.89 | 1.03 (0.88 - 1.21) | 1.05 (0.83 - 1.34) |
|  | Model 2 | 1 | 0.97 (0.58 - 1.63) | 1.40 (0.87 - 2.24) | 1.08 (0.65 - 1.79) | 0.84 (0.49 - 1.44) | 0.74 | 1.02 (0.87 - 1.20) | 1.03 (0.81 - 1.32) |
| **Rectal cancer** | |  |  |  |  |  |  |  |  |
|  | *N* cases | 34 | 21 | 25 | 29 | 25 |  |  |  |
|  | Model 1 | 1 | 0.64 (0.37 - 1.11) | 0.82 (0.49 - 1.38) | 0.96 (0.58 - 1.58) | 0.87 (0.51 - 1.47) | 0.96 | 0.97 (0.82 - 1.15) | 0.96 (0.73 - 1.25) |
|  | Model 2 | 1 | 0.64 (0.37 - 1.12) | 0.81 (0.48 - 1.37) | 0.95 (0.58 - 1.58) | 0.86 (0.51 - 1.46) | 0.99 | 0.97 (0.81 - 1.15) | 0.95 (0.73 - 1.24) |
| **ii) Exclude women with polycystic ovary syndrome (N=329)** | | | | | | | | | |
| **Colorectal cancer** | |  |  |  |  |  |  |  |  |
|  | *N* cases | 184 | 167 | 170 | 156 | 154 |  |  |  |
|  | Model 1 | 1 | 0.96 (0.78 - 1.19) | 1.03 (0.84 - 1.28) | 0.98 (0.79 - 1.22) | 1.01 (0.81 - 1.25) | 0.88 | 1.01 (0.94 - 1.08) | 1.01 (0.91 - 1.12) |
|  | Model 2 | 1 | 0.96 (0.78 - 1.18) | 1.02 (0.83 - 1.26) | 0.96 (0.78 - 1.20) | 0.98 (0.79 - 1.22) | 0.91 | 1.00 (0.93 - 1.07) | 1.00 (0.90 - 1.11) |
| **Colon cancer** | |  |  |  |  |  |  |  |  |
|  | *N* cases | 132 | 127 | 123 | 116 | 114 |  |  |  |
|  | Model 1 | 1 | 1.03 (0.81 - 1.31) | 1.05 (0.82 - 1.35) | 1.04 (0.81 - 1.33) | 1.06 (0.82 - 1.36) | 0.68 | 1.04 (0.96 - 1.12) | 1.06 (0.93 - 1.19) |
|  | Model 2 | 1 | 1.02 (0.80 - 1.31) | 1.04 (0.81 - 1.33) | 1.02 (0.79 - 1.31) | 1.03 (0.80 - 1.33) | 0.83 | 1.03 (0.95 - 1.11) | 1.04 (0.92 - 1.18) |
| **Proximal colon cancer** | |  |  |  |  |  |  |  |  |
|  | *N* cases | 81 | 80 | 51 | 61 | 65 |  |  |  |
|  | Model 1 | 1 | 1.07 (0.79 - 1.46) | 0.73 (0.51 - 1.04) | 0.93 (0.66 - 1.30) | 1.04 (0.74 - 1.45) | 0.78 | 1.01 (0.91 - 1.13) | 1.02 (0.86 - 1.20) |
|  | Model 2 | 1 | 1.06 (0.78 - 1.45) | 0.72 (0.50 - 1.02) | 0.91 (0.65 - 1.28) | 1.00 (0.72 - 1.40) | 0.64 | 1.00 (0.90 - 1.12) | 1.00 (0.85 - 1.18) |
| **Distal colon cancer** | |  |  |  |  |  |  |  |  |
|  | *N* cases | 46 | 43 | 63 | 51 | 43 |  |  |  |
|  | Model 1 | 1 | 0.98 (0.65 - 1.49) | 1.49 (1.02 - 2.18) | 1.23 (0.82 - 1.84) | 1.40 (0.68 - 1.59) | 0.50 | 1.05 (0.93 - 1.19) | 1.08 (0.89 - 1.31) |
|  | Model 2 | 1 | 0.97 (0.64 - 1.48) | 1.46 (1.00 - 2.15) | 1.20 (0.80 - 1.79) | 1.01 (0.66 - 1.54) | 0.61 | 1.04 (0.92 - 1.18) | 1.06 (0.87 - 1.29) |
| **Rectal cancer** | |  |  |  |  |  |  |  |  |
|  | *N* cases | 52 | 40 | 47 | 40 | 40 |  |  |  |
|  | Model 1 | 1 | 0.79 (0.53 - 1.20) | 0.98 (0.66 - 1.45) | 0.85 (0.56 - 1.29) | 0.89 (0.58 - 1.35) | 0.68 | 0.93 (0.81 - 1.07) | 0.90 (0.73 - 1.10) |
|  | Model 2 | 1 | 0.79 (0.52 - 1.19) | 0.96 (0.64 - 1.42) | 0.82 (0.54 - 1.25) | 0.86 (0.56 - 1.30) | 0.55 | 0.92 (0.80 - 1.05) | 0.88 (0.71 - 1.08) |
|  | **(B) Free testosterone** | |  |  |  |  |  |  |  |
|  |  | **Q1** | **Q2** | **Q3** | **Q4** | **Q5** | **P-trend** | **HR c** | **HR (adjusted) d** |
| **i) Exclude women who ever used hormone-replacement therapy (N=50,948)** | | | | | | | | | |
| **Colorectal cancer** | |  |  |  |  |  |  |  |  |
|  | *N* cases | 107 | 91 | 95 | 97 | 94 |  |  |  |
|  | Model 1 | 1 | 0.84 (0.63 - 1.11) | 0.91 (0.69 - 1.21) | 0.93 (0.70 - 1.23) | 0.89 (0.66 - 1.19) | 0.68 | 0.98 (0.83 - 1.16) | 0.97 (0.76 - 1.23) |
|  | Model 3 | 1 | 0.83 (0.62 - 1.10) | 0.89 (0.67 - 1.19) | 0.90 (0.67 - 1.19) | 0.85 (0.63 - 1.14) | 0.46 | 0.95 (0.80 - 1.13) | 0.93 (0.73 - 1.18) |
| **Colon cancer** | |  |  |  |  |  |  |  |  |
|  | *N* cases | 73 | 69 | 66 | 75 | 67 |  |  |  |
|  | Model 1 | 1 | 0.93 (0.66 - 1.29) | 0.93 (0.66 - 1.30) | 1.03 (0.74 - 1.44) | 0.91 (0.64 - 1.29) | 0.85 | 1.00 (0.82 - 1.22) | 1.00 (0.76 - 1.32) |
|  | Model 3 | 1 | 0.91 (0.65 - 1.27) | 0.90 (0.64 - 1.27) | 0.99 (0.71 - 1.39) | 0.86 (0.60 - 1.23) | 0.60 | 0.97 (0.79 - 1.18) | 0.95 (0.72 - 1.26) |
| **Proximal colon cancer** | |  |  |  |  |  |  |  |  |
|  | *N* cases | 42 | 36 | 30 | 42 | 30 |  |  |  |
|  | Model 1 | 1 | 0.84 (0.54 - 1.32) | 0.73 (0.45 - 1.17) | 1.00 (0.65 - 1.56) | 0.71 (0.44 - 1.17) | 0.40 | 0.93 (0.71 - 1.23) | 0.91 (0.62 - 1.33) |
|  | Model 3 | 1 | 0.82 (0.52 - 1.29) | 0.70 (0.43 - 1.13) | 0.94 (0.60 - 1.48) | 0.66 (0.40 - 1.09) | 0.24 | 0.89 (0.67 - 1.18) | 0.84 (0.57 - 1.26) |
| **Distal colon cancer** | |  |  |  |  |  |  |  |  |
|  | *N* cases | 30 | 31 | 33 | 31 | 30 |  |  |  |
|  | Model 1 | 1 | 1.00 (0.60 - 1.66) | 1.08 (0.66 - 1.79) | 0.98 (0.59 - 1.64) | 0.90 (0.53 - 1.54) | 0.71 | 0.94 (0.70 - 1.27) | 0.92 (0.61 - 1.40) |
|  | Model 3 | 1 | 0.97 (0.58 - 1.61) | 1.04 (0.63 - 1.72) | 0.92 (0.55 - 1.55) | 0.83 (0.49 - 1.43) | 0.50 | 0.90 (0.66 - 1.22) | 0.86 (0.56 - 1.32) |
| **Rectal cancer** | |  |  |  |  |  |  |  |  |
|  | *N* cases | 34 | 22 | 29 | 22 | 27 |  |  |  |
|  | Model 1 | 1 | 0.66 (0.38 - 1.13) | 0.88 (0.53 - 1.46) | 0.70 (0.40 - 1.22) | 0.85 (0.50 - 1.47) | 0.63 | 0.92 (0.66 - 1.27) | 0.88 (0.56 - 1.39) |
|  | Model 3 | 1 | 0.66 (0.38 - 1.13) | 0.87 (0.52 - 1.45) | 0.69 (0.39 - 1.20) | 0.84 (0.48 - 1.46) | 0.59 | 0.91 (0.65 - 1.26) | 0.87 (0.55 - 1.38) |
| **ii) Exclude women with polycystic ovary syndrome (N=329)** | | | | | | | | | |
| **Colorectal cancer** | |  |  |  |  |  |  |  |  |
|  | *N* cases | 192 | 156 | 156 | 169 | 158 |  |  |  |
|  | Model 1 | 1 | 0.82 (0.66 - 1.01) | 0.84 (0.68 - 1.04) | 0.92 (0.74 - 1.13) | 0.87 (0.70 - 1.09) | 0.49 | 0.96 (0.85 - 1.09) | 0.94 (0.79 - 1.13) |
|  | Model 3 | 1 | 0.80 (0.65 - 0.99) | 0.82 (0.60 - 1.01) | 0.88 (0.71 - 1.09) | 0.83 (0.66 - 1.04) | 0.25 | 0.93 (0.81 - 1.06) | 0.90 (0.75 - 1.08) |
| **Colon cancer** | |  |  |  |  |  |  |  |  |
|  | *N* cases | 132 | 121 | 117 | 124 | 118 |  |  |  |
|  | Model 1 | 1 | 0.92 (0.72 - 1.18) | 0.92 (0.72 - 1.19) | 0.98 (0.77 - 1.17) | 0.95 (0.73 - 1.24) | 0.91 | 1.01 (0.87 - 1.17) | 1.02 (0.82 - 1.25) |
|  | Model 3 | 1 | 0.91 (0.71 - 1.17) | 0.90 (0.70 - 1.16) | 0.95 (0.74 - 1.23) | 0.91 (0.69 - 1.18) | 0.62 | 0.98 (0.84 - 1.14) | 0.98 (0.79 - 1.21) |
| **Proximal colon cancer** | |  |  |  |  |  |  |  |  |
|  | *N* cases | 78 | 72 | 57 | 72 | 59 |  |  |  |
|  | Model 1 | 1 | 0.93 (0.68 - 1.29) | 0.78 (0.55 - 1.10) | 0.99 (0.71 - 1.38) | 0.84 (0.58 - 1.19) | 0.47 | 0.94 (0.77 - 1.15) | 0.92 (0.69 - 1.22) |
|  | Model 3 | 1 | 0.91 (0.66 - 1.26) | 0.76 (0.53 - 1.07) | 0.94 (0.68 - 1.32) | 0.78 (0.54 - 1.12) | 0.26 | 0.90 (0.73 - 1.11) | 0.87 (0.65 - 1.16) |
| **Distal colon cancer** | |  |  |  |  |  |  |  |  |
|  | *N* cases | 50 | 44 | 54 | 47 | 51 |  |  |  |
|  | Model 1 | 1 | 0.87 (0.58 - 1.31) | 1.05 (0.71 - 1.55) | 0.91 (0.61 - 1.37) | 0.97 (0.64 - 1.46) | 0.96 | 1.03 (0.82 - 1.30) | 1.05 (0.75 - 1.45) |
|  | Model 3 | 1 | 0.86 (0.57 - 1.29) | 1.02 (0.69 - 1.51) | 0.88 (0.58 - 1.33) | 0.93 (0.61 - 1.41) | 0.80 | 1.01 (0.79 - 1.28) | 1.01 (0.72 - 1.42) |
| **Rectal cancer** | |  |  |  |  |  |  |  |  |
|  | *N* cases | 60 | 35 | 39 | 45 | 40 |  |  |  |
|  | Model 1 | 1 | 0.59 (0.39 - 0.89) | 0.67 (0.44 - 1.00) | 0.77 (0.51 - 1.14) | 0.70 (0.46 - 1.07) | 0.25 | 0.83 (0.64 - 1.07) | 0.77 (0.54 - 1.10) |
|  | Model 3 | 1 | 0.58 (0.38 - 0.88) | 0.65 (0.43 - 0.97) | 0.73 (0.49 - 1.09) | 0.66 (0.43 - 1.01) | 0.16 | 0.79 (0.61 - 1.03) | 0.72 (0.50 - 1.04) |
|  | **(C) SHBG** |  |  |  |  |  |  |  |  |
|  |  | **Q1** | **Q2** | **Q3** | **Q4** | **Q5** | **P-trend** | **HR e** | **HR (adjusted) f** |
| **i) Exclude women who ever used hormone-replacement therapy (N=50,948)** | | | | | | | | | |
| **Colorectal cancer** | |  |  |  |  |  |  |  |  |
|  | *N* cases | 98 | 90 | 92 | 107 | 97 |  |  |  |
|  | Model 1 | 1 | 0.94 (0.71 - 1.26) | 1.02 (0.76 - 1.37) | 1.26 (0.93 - 1.69) | 1.24 (0.90 - 1.70) | 0.049 | 1.11 (1.00 - 1.23) | 1.13 (1.00 - 1.29) |
|  | Model 4 | 1 | 0.96 (0.72 - 1.29) | 1.07 (0.79 - 1.44) | 1.35 (1.00 - 1.84) | 1.37 (0.98 - 1.90) | 0.012 | 1.15 (1.03 - 1.28) | 1.18 (1.03 - 1.35) |
| **Colon cancer** | |  |  |  |  |  |  |  |  |
|  | *N* cases | 73 | 68 | 64 | 75 | 70 |  |  |  |
|  | Model 1 | 1 | 0.95 (0.68 - 1.33) | 0.96 (0.68 - 1.37) | 1.22 (0.86 - 1.72) | 1.23 (0.85 - 1.78) | 0.12 | 1.13 (1.00 - 1.27) | 1.16 (1.00 - 1.34) |
|  | Model 4 | 1 | 0.97 (0.69 - 1.36) | 1.01 (0.71 - 1.45) | 1.32 (0.93 - 1.89) | 1.37 (0.93 - 2.01) | 0.037 | 1.17 (1.03 - 1.34) | 1.22 (1.04 - 1.42) |
| **Proximal colon cancer** | |  |  |  |  |  |  |  |  |
|  | *N* cases | 35 | 38 | 28 | 39 | 40 |  |  |  |
|  | Model 1 | 1 | 1.08 (0.67 - 1.72) | 0.86 (0.51 - 1.45) | 1.32 (0.81 - 2.17) | 1.48 (0.88 - 2.47) | 0.10 | 1.17 (0.98 - 1.38) | 1.21 (0.98 - 1.49) |
|  | Model 4 | 1 | 1.13 (0.70 - 1.80) | 0.96 (0.57 - 1.61) | 1.53 (0.92 - 2.55) | 1.75 (1.02 - 3.00) | 0.024 | 1.24 (1.04 - 1.49) | 1.31 (1.05 - 1.63) |
| **Distal colon cancer** | |  |  |  |  |  |  |  |  |
|  | *N* cases | 34 | 30 | 29 | 34 | 28 |  |  |  |
|  | Model 1 | 1 | 0.95 (0.57 - 1.56) | 1.00 (0.60 - 1.69) | 1.25 (0.75 - 2.09) | 1.14 (0.65 - 2.00) | 0.40 | 1.13 (0.94 - 1.36) | 1.16 (0.93 - 1.45) |
|  | Model 4 | 1 | 0.95 (0.57 - 1.57) | 1.03 (0.61 - 1.74) | 1.33 (0.78 - 2.24) | 1.26 (0.70 - 2.25) | 0.23 | 1.18 (0.98 - 1.43) | 1.22 (0.97 - 1.54) |
| **Rectal cancer** | |  |  |  |  |  |  |  |  |
|  | *N* cases | 25 | 22 | 28 | 32 | 27 |  |  |  |
|  | Model 1 | 1 | 0.92 (0.51 - 1.65) | 1.18 (0.67 - 2.09) | 1.37 (0.77 - 2.42) | 1.27 (0.68 - 2.35) | 0.22 | 1.06 (0.86 - 1.29) | 1.07 (0.84 - 1.37) |
|  | Model 4 | 1 | 0.93 (0.52 - 1.68) | 1.21 (0.68 - 2.15) | 1.43 (0.79 - 2.57) | 1.36 (0.71 - 2.59) | 0.16 | 1.07 (0.87 - 1.33) | 1.09 (0.84 - 1.41) |
| **ii) Exclude women with polycystic ovary syndrome (N=329)** | | | | | | | | | |
| **Colorectal cancer** | |  |  |  |  |  |  |  |  |
|  | *N* cases | 161 | 171 | 148 | 184 | 167 |  |  |  |
|  | Model 1 | 1 | 1.09 (0.87 - 1.35) | 0.98 (0.77 - 1.23) | 1.28 (1.02 - 1.61) | 1.26 (0.99 - 1.60) | 0.024 | 1.09 (1.01 - 1.18) | 1.11 (1.01 - 1.22) |
|  | Model 4 | 1 | 1.11 (0.89 - 1.39) | 1.02 (0.81 - 1.29) | 1.38 (1.09 - 1.75) | 1.40 (1.09 - 1.80) | 0.002 | 1.13 (1.04 - 1.23) | 1.16 (1.05 - 1.29) |
| **Colon cancer** | |  |  |  |  |  |  |  |  |
|  | *N* cases | 126 | 128 | 106 | 130 | 122 |  |  |  |
|  | Model 1 | 1 | 1.03 (0.80 - 1.32) | 0.89 (0.68 - 1.16) | 1.16 (0.89 - 1.51) | 1.18 (0.89 - 1.56) | 0.17 | 1.08 (0.99 - 1.19) | 1.10 (0.98 - 1.23) |
|  | Model 4 | 1 | 1.06 (0.82 - 1.36) | 0.93 (0.71 - 1.22) | 1.24 (0.95 - 1.63) | 1.29 (0.97 - 1.73) | 0.048 | 1.12 (1.02 - 1.24) | 1.15 (1.02 - 1.30) |
| **Proximal colon cancer** | |  |  |  |  |  |  |  |  |
|  | *N* cases | 67 | 75 | 54 | 72 | 70 |  |  |  |
|  | Model 1 | 1 | 1.12 (0.80 - 1.57) | 0.85 (0.58 - 1.23) | 1.21 (0.85 - 1.73) | 1.27 (0.87 - 1.85) | 0.21 | 1.12 (0.99 - 1.27) | 1.15 (0.99 - 1.34) |
|  | Model 4 | 1 | 1.17 (0.83 - 1.64) | 0.91 (0.62 - 1.32) | 1.35 (0.93 - 1.95) | 1.47 (0.99 - 2.18) | 0.05 | 1.19 (1.04 - 1.35) | 1.23 (1.05 - 1.44) |
| **Distal colon cancer** | |  |  |  |  |  |  |  |  |
|  | *N* cases | 53 | 49 | 43 | 53 | 48 |  |  |  |
|  | Model 1 | 1 | 0.98 (0.66 - 1.45) | 0.92 (0.61 - 1.40) | 1.21 (0.80 - 1.82) | 1.20 (0.78 - 1.86) | 0.25 | 1.09 (0.94 - 1.26) | 1.11 (0.93 - 1.32) |
|  | Model 4 | 1 | 0.98 (0.66 - 1.46) | 0.94 (0.61 - 1.43) | 1.25 (0.82 - 1.90) | 1.28 (0.81 - 2.01) | 0.17 | 1.11 (0.96 - 1.30) | 1.14 (0.95 - 1.37) |
| **Rectal cancer** | |  |  |  |  |  |  |  |  |
|  | *N* cases | 35 | 43 | 42 | 54 | 45 |  |  |  |
|  | Model 1 | 1 | 1.28 (0.81 - 2.01) | 1.28 (0.80 - 2.04) | 1.72 (1.09 - 2.73) | 1.55 (0.94 - 2.53) | 0.039 | 1.10 (0.94 - 1.28) | 1.12 (0.93 - 1.35) |
|  | Model 4 | 1 | 1.31 (0.83 - 2.06) | 1.34 (0.83 - 2.14) | 1.87 (1.16 - 2.99) | 1.76 (1.06 - 2.95) | 0.011 | 1.15 (0.97 - 1.35) | 1.18 (0.97 - 1.44) |
| HR=hazard ratio; CI=confidence interval; SD=standard deviation. Model 1: Multivariable Cox regression model using age as the underlying time variable and stratified by sex, Townsend deprivation index (quintiles), region of the recruitment assessment center, and age at recruitment. Models adjusted for waist circumference (per 5 cm), total physical activity (<10, 10-<20, 20-<40, 40-<60, ≥60 MET hours per week, unknown), height (per 10 cm), alcohol consumption frequency (never, special occasions only, 1-3 times per month, 1-2 times per week, 3-4 times per week, daily/almost daily, unknown), smoking status and intensity (never, former, current- <15 per day, current- ≥15 per day, current- intensity unknown, unknown), frequency of red and processed meat consumption (<2, 2-<3, 3-<4, ≥4 occasions per week, unknown), family history of colorectal cancer (no, yes, unknown), educational level (CSEs/O-levels/GCSEs or equivalent, NVQ/HND/HNC/A-levels/AS-levels or equivalent, other professional qualifications, college/university degree, none of the above, unknown), regular aspirin/ibuprofen use (no, yes, unknown). In analysis (ii) models were also adjusted for ever use of hormone replacement therapy (no, yes, unknown). | | | | | | | | | |
| Model 2: Model 1 plus additional adjustment for circulating levels (sex-specific quintiles, missing/unknown) of C-reactive protein (CRP; mg/L), glycated hemoglobin (HbA1c; mmol/mol), sex hormone binding globulin (SHBG; nmol/L), and Insulin-like growth factor-1 (IGF-1; nmol/L).  Model 3: Model 1 plus additional adjustment for circulating levels (sex-specific quintiles, missing/unknown) of C-reactive protein (CRP; mg/L), glycated hemoglobin (HbA1c; mmol/mol), and Insulin-like growth factor-1 (IGF-1; nmol/L).  Model 4: Model 1 plus additional adjustment for circulating levels (sex-specific quintiles, missing/unknown) of C-reactive protein (CRP; mg/L), glycated hemoglobin (HbA1c; mmol/mol), total testosterone (nmol/L), and Insulin-like growth factor-1 (IGF-1; nmol/L). | | | | | | | | | |
| a : HRs per 1-SD increment in both women and men.  b: HRs were additionally corrected for regression dilution using a regression dilution ratio (0.65 in women) obtained from the subsample of participants with repeat total testosterone measurements.  c : HRs per 1-unit increment (log scale) in women and per 1-SD increment in men.  d: HRs were additionally corrected for regression dilution using a regression dilution ratio (0.71 in women) obtained from the subsample of participants with repeat free testosterone measurements.  e: HRs per 1-SD increment in women and per 1-unit increment (log scale) in men.  f: HRs were additionally corrected for regression dilution using a regression dilution ratio (0.82 in women) obtained from the subsample of participants with repeat SHBG measurements. | | | | | | | | | |
